# Supplementary material for: SIRT7 suppresses energy expenditure and thermogenesis by regulating brown adipose tissue functions in mice
Source: PubMed Central journal article supplement (PMC9744749; doi:10.1038/s41467-022-35219-z), 2022-12-12
Supplement: 41467_2022_35219_MOESM1_ESM.pdf [file 41467_2022_35219_MOESM1_ESM.pdf]

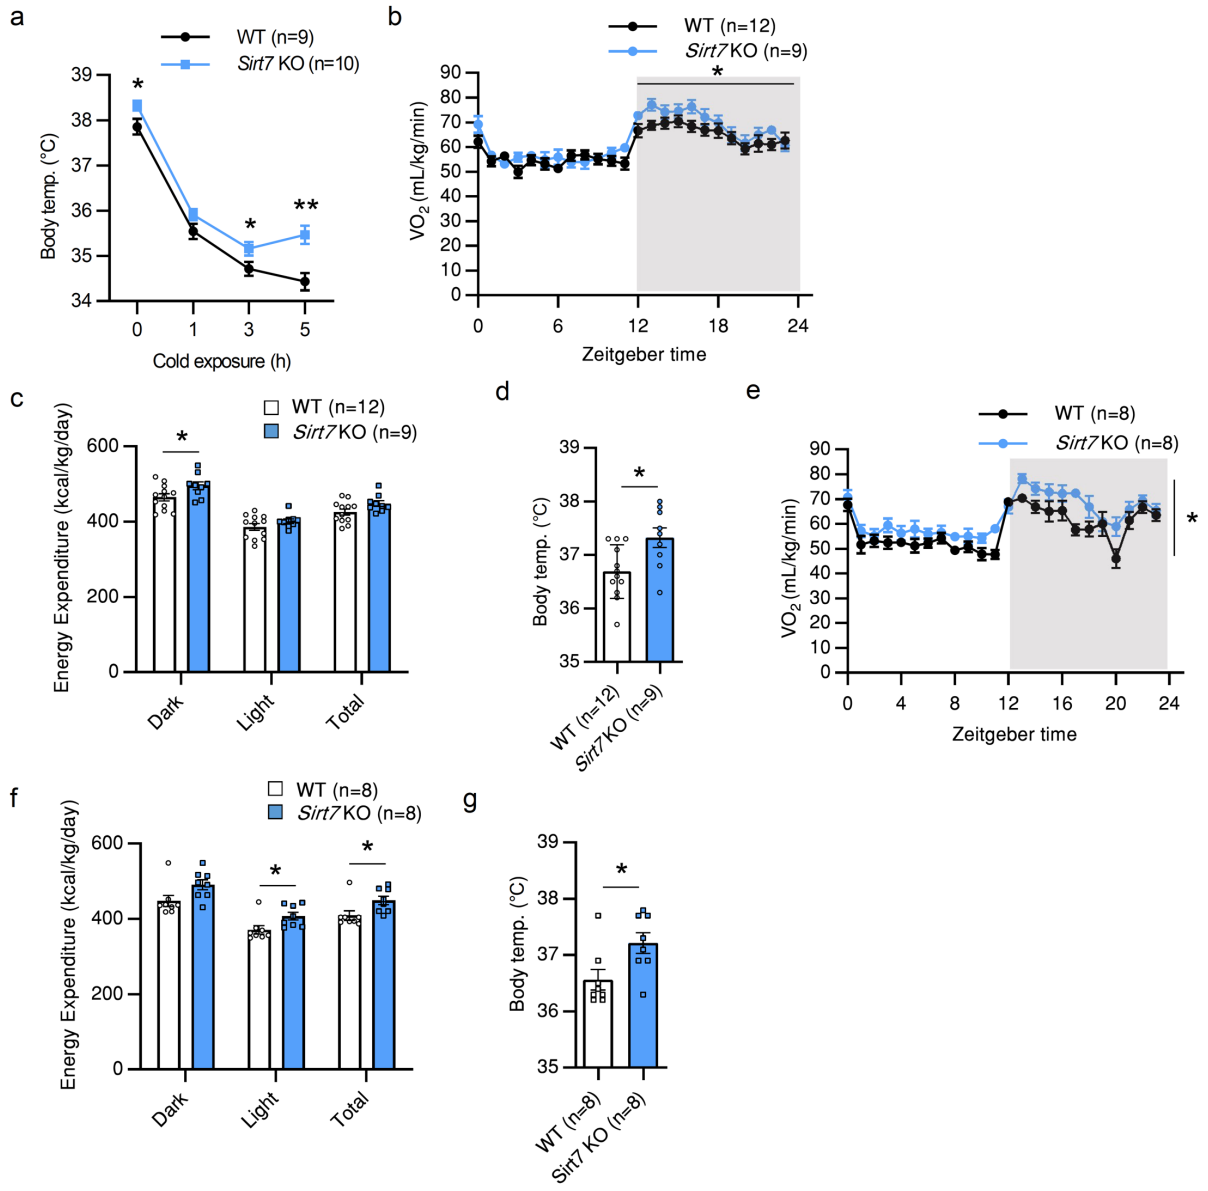

**Supplementary Fig. 1 *Sirt7* KO mice display increased energy expenditure and body temperature under normal conditions.**

**a** Body temperature in 11-week-old male WT and *Sirt7* KO mice upon cold exposure at 4°C.  $p = 0.0328$  (0 h),  $p = 0.0485$  (3 h),  $p = 0.0018$  (5 h). **b–d** Data of indirect calorimetry experiments and body temperature from 16-week-old female WT and *Sirt7* KO mice.  $\text{VO}_2$  rates (**b**), energy expenditure (**c**), and body temperature at ZT10 (**d**).  $p = 0.0483$  in (**b**);  $p = 0.0466$  (Dark) in (**c**);  $p = 0.0135$  in (**d**). **e–g** Data of indirect calorimetry experiments and body temperature from 2-month-old male WT and another independent line of *Sirt7* KO mice<sup>35</sup>.  $\text{VO}_2$  rates (**e**), energy expenditure (**f**), and body temperature at ZT10 (**g**).  $p = 0.0323$  in (**e**);  $p = 0.0503$  (Dark),  $p = 0.0288$  (Light),  $p = 0.0350$  (Total) in (**f**);  $p = 0.0242$  in (**g**). Data are presented as means  $\pm$  SEM. All numbers (n) are biologically independent samples. Two-way ANOVA with Bonferroni's multiple comparisons test (**b**, **e**); two-tailed Student's *t*-test (**a**, **c**, **d**, **f**, **g**). \* $p < 0.05$ , \*\* $p < 0.01$ . Source data are provided in Source data file.

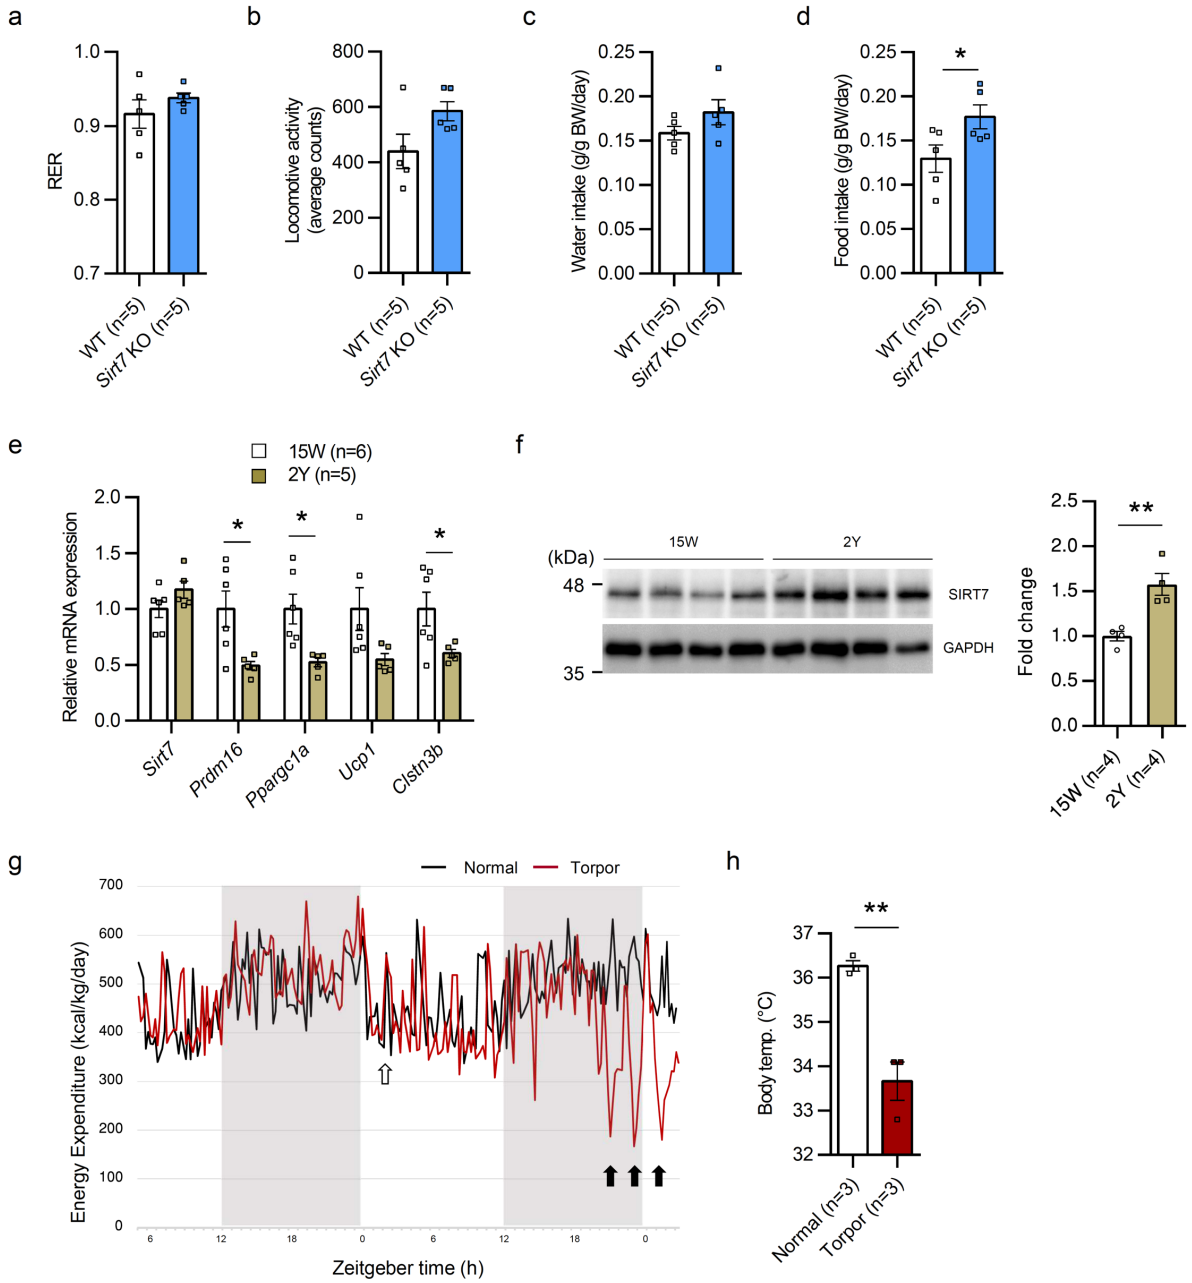

**Supplementary Fig. 2 *Sirt7* KO mice exhibit excessive energy expenditure and thermogenesis in the hypometabolic state.**

**a–d** Data of indirect calorimetry experiments from 2-year-old male WT and *Sirt7* KO mice. RER (**a**), locomotor activity (**b**), water intake (**c**), and food intake (**d**).  $p = 0.0488$  in (**d**). **e** Real-time qPCR analysis of BAT-related genes in iBAT of 15-week-old and 2-year-old male WT mice.  $p = 0.0250$  (*Prdm16*),  $p = 0.0153$  (*Ppargc1a*),  $p = 0.0664$  (*Ucp1*),  $p = 0.0464$  (*Clstn3b*). **f** Western blot analysis of SIRT7 in iBAT of 15-week-old and 2-year-old male WT mice.  $p = 0.0050$ . **g, h** Data of indirect calorimetry experiments and body temperature during artificially-induced daily torpor in 18-week-old male WT mice. Representative pattern of energy expenditure (**g**). The mouse was placed in the chamber at 20°C for 3 days; food was removed on the second day (open arrow) in the Torpor groups. A typical daily torpor pattern started after 20 h of fasting (filled arrow). Body temperature after 24 h fasting (**h**).  $p = 0.0044$ . Data are presented as means  $\pm$  SEM. All numbers (n) are biologically independent samples.  $*p < 0.05$ ,  $**p < 0.01$  by two-tailed Student's t-test. Source data are provided in Source data file.

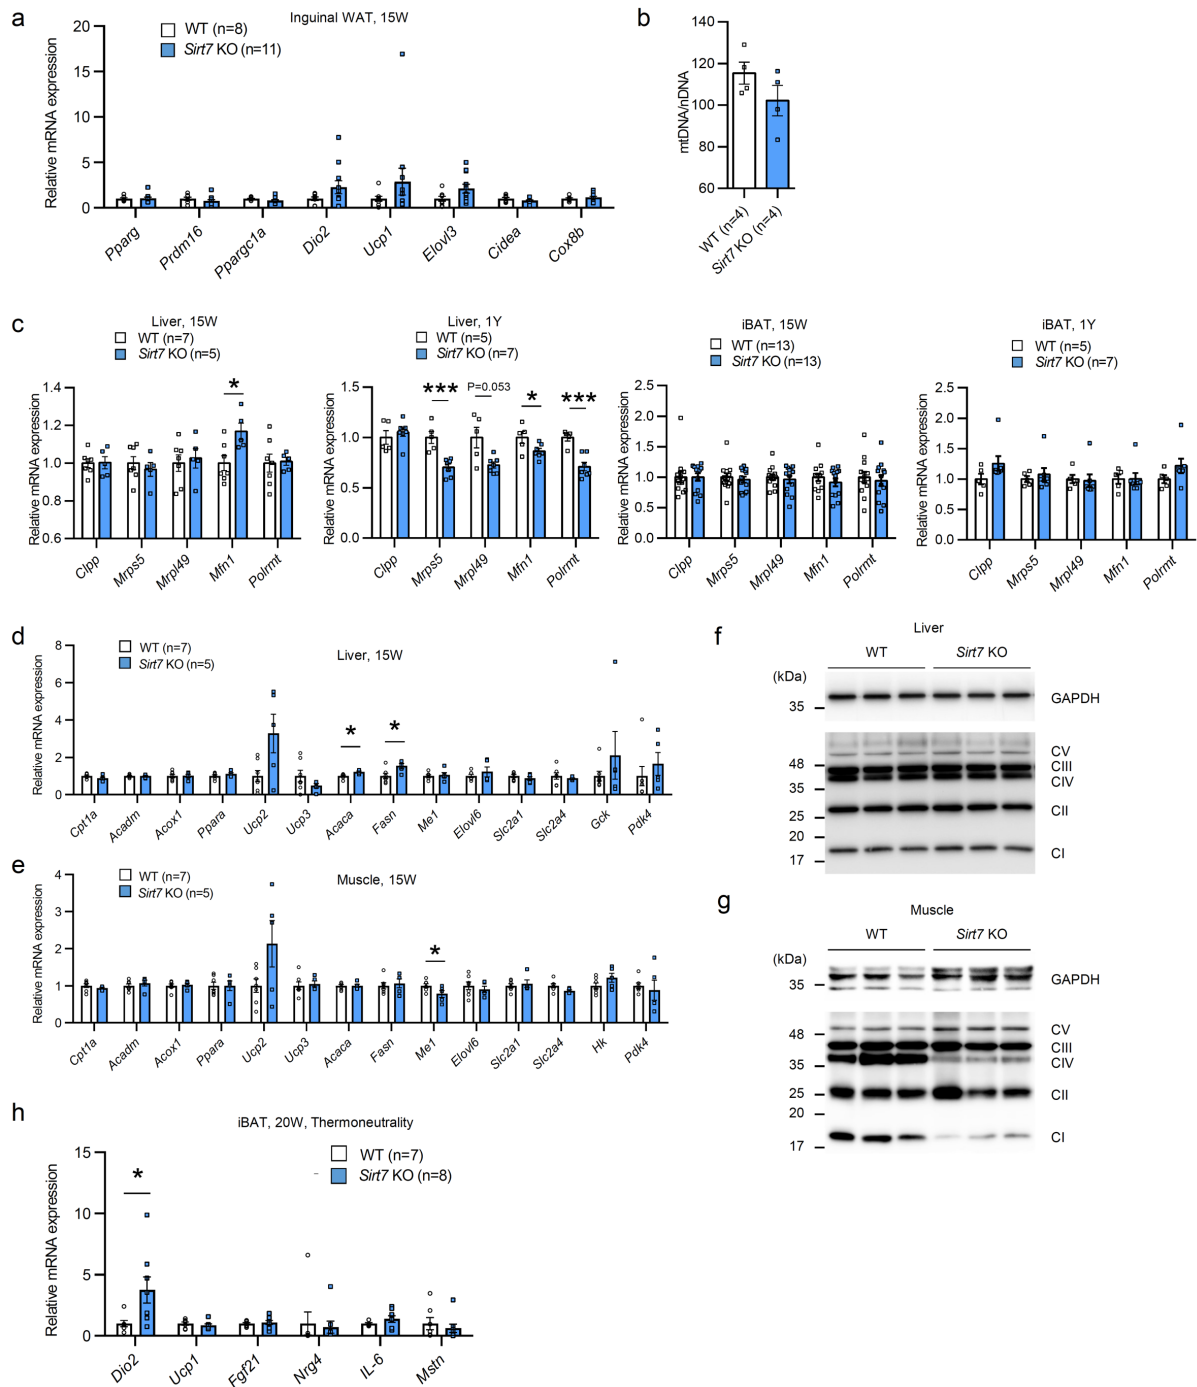

**Supplementary Fig. 3 SIRT7 suppresses energy expenditure and thermogenesis via multiple pathways.**

**a** Real-time qPCR analysis of BAT-related genes in inguinal WAT of 15-week-old male WT and *Sirt7* KO mice. **b** Evaluation of the mtDNA copy number in iBAT of 15-week-old male WT and *Sirt7* KO mice by determining the ratio of mtDNA to nuclear DNA (nDNA). **c** Real-time qPCR analysis of nuclear-encoded mitochondrial transcripts in liver and iBAT of 15-week-old and 1-year-old male WT and *Sirt7* KO mice. The expression of the mitochondrial unfolded protein response gene *Clpp* is increased in hematopoietic stem cells isolated from *Sirt7* KO mice<sup>45</sup>, and the expression of genes related to mitochondrial biogenesis, namely, *Mrps5*, *Mrpl49*, *Mfn1*, and *Polrmt*, is reduced in the liver of aged *Sirt7* KO mice<sup>35</sup>.  $p = 0.0174$  (*Mfn1*) in liver, 15 weeks.  $p = 0.0009$  (*Mrps5*),  $p = 0.0525$  (*Mrpl49*),  $p = 0.0424$  (*Mfn1*),  $p = 0.0005$  (*Polrmt*) in liver, 1 year. **d, e** Real-time qPCR analysis of energy metabolism-related genes in liver (**d**) and skeletal muscle (**e**) of 15-week-old male WT and *Sirt7* KO mice.  $p = 0.0101$  (*Acaca*),  $p = 0.0269$  (*Fasn*) in (**d**);  $p = 0.0499$  (*Me1*) in (**e**). **f, g** Western blot analysis of OXPHOS complexes I–IV in liver (**f**) and skeletal muscle (**g**) of 15-week-old male WT and *Sirt7* KO mice. **h** Real-time qPCR analysis of batokine genes in iBAT of 20-week-old male WT and *Sirt7* KO mice at thermoneutrality.  $p = 0.0375$  (*Dio2*). Data are presented as means  $\pm$  SEM. All numbers (n) are biologically independent samples.  $*p < 0.05$ ,  $**p < 0.01$ ,  $***p < 0.001$  by two-tailed Student's *t*-test. Source data are provided in Source data file.

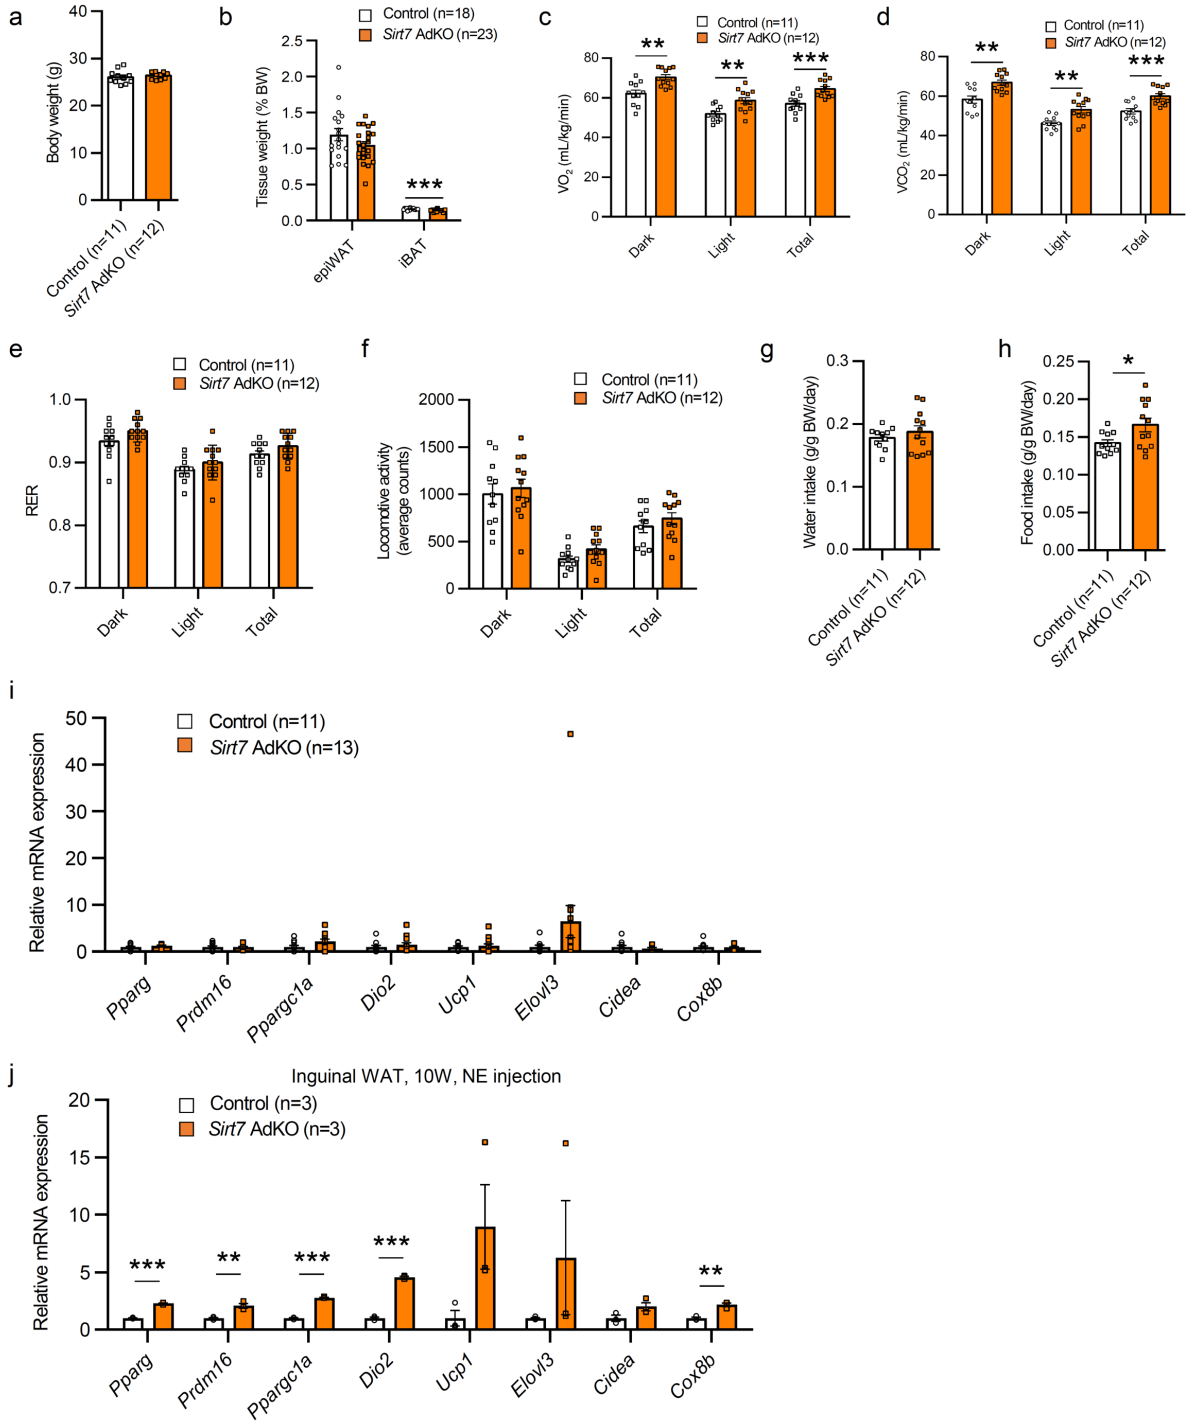

**Supplementary Fig. 4 SIRT7 deficiency in adipose tissue elevates the whole-body energy expenditure and body temperature.**

**a–h** Data of indirect calorimetry experiments from 12-week-old male *Adipoq-Cre* control and *Sirt7* AdKO mice. Body weight (**a**), percent tissue weight calculated relative to body weight (**b**), average  $\text{VO}_2$  (**c**), average  $\text{VCO}_2$  (**d**), RER (**e**), locomotor activity (**f**), water intake (**g**), and food intake (**h**).  $p = 0.0007$  (iBAT) in (**b**);  $p = 0.0012$  (Dark),  $p = 0.0033$  (Light),  $p = 0.0007$  (Total) in (**c**);  $p = 0.0010$  (Dark),  $p = 0.0025$  (Light),  $p = 0.0004$  (Total) in (**d**);  $p = 0.0279$  in (**h**). **i** Real-time qPCR analysis of BAT-related genes in inguinal WAT of 12-week-old male *Adipoq-Cre* control and *Sirt7* AdKO mice. **j** Real-time qPCR analysis of BAT-related genes in inguinal WAT of 10-week-old male *Adipoq-Cre* control and *Sirt7* AdKO mice administered 1 mg/kg/day norepinephrine (NE) for 5 days.  $p = 2.7\text{E}-05$  (*Pparg*),  $p = 0.0077$  (*Prdm16*),  $p = 2.8\text{E}-05$  (*Ppargc1a*),  $p = 9.7\text{E}-06$  (*Dio2*),  $p = 0.0039$  (*Cox8b*). Data are presented as means  $\pm$  SEM. All numbers (n) are biologically independent samples.  $*p < 0.05$ ,  $**p < 0.01$ ,  $***p < 0.001$  by two-tailed Student's *t*-test. Source data are provided in Source data file.



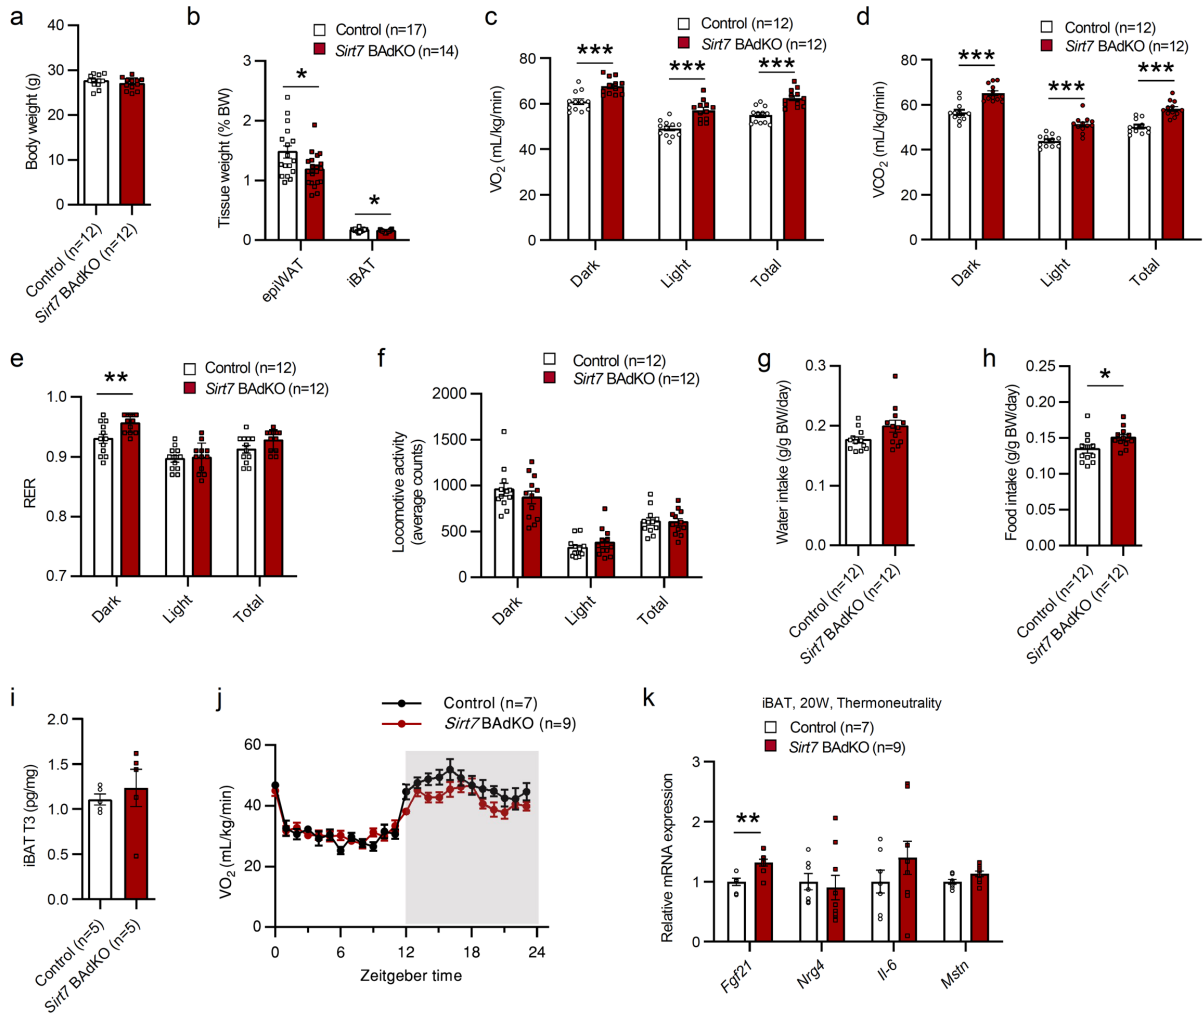

**Supplementary Fig. 5 Brown adipocytic SIRT7 suppresses energy expenditure and thermogenesis *in vivo*.**

**a–h** Data of indirect calorimetry experiments from 12-week-old male *Ucp1-Cre* control and *Sirt7* BAdKO mice. Body weight (**a**), percent tissue weight calculated relative to body weight (**b**), average  $VO_2$  (**c**), average  $VCO_2$  (**d**), RER (**e**), locomotor activity (**f**), water intake (**g**), and food intake (**h**).  $p = 0.0428$  (epiWAT),  $p = 0.0474$  (iBAT) in (**b**);  $p = 0.0004$  (Dark),  $p = 0.0001$  (Light),  $p = 0.0001$  (Total) in (**c**);  $p = 2.7E-05$  (Dark),  $p = 8.3E-06$  (Light),  $p = 5.0E-06$  (Total) in (**d**);  $p = 0.0087$  (Dark) in (**e**);  $p = 0.0335$  in (**h**). **i** T3 level in iBAT of 12-week-old male *Ucp1-Cre* control and *Sirt7* BAdKO mice. **j, k**  $VO_2$  rates of indirect calorimetry experiments (**j**) and real-time qPCR analysis of batokine genes in iBAT (**k**) from 20-week-old male *Ucp1-Cre* control and *Sirt7* BAdKO mice at thermoneutrality.  $p = 0.0016$  (*Fgf21*). Data are presented as means  $\pm$  SEM. All numbers (n) are biologically independent samples. Two-way ANOVA with Bonferroni's multiple comparisons test (**j**); two-tailed Student's *t*-test (**a–i, k**).  $*p < 0.05$ ,  $**p < 0.01$ ,  $***p < 0.001$ . Source data are provided in Source data file.

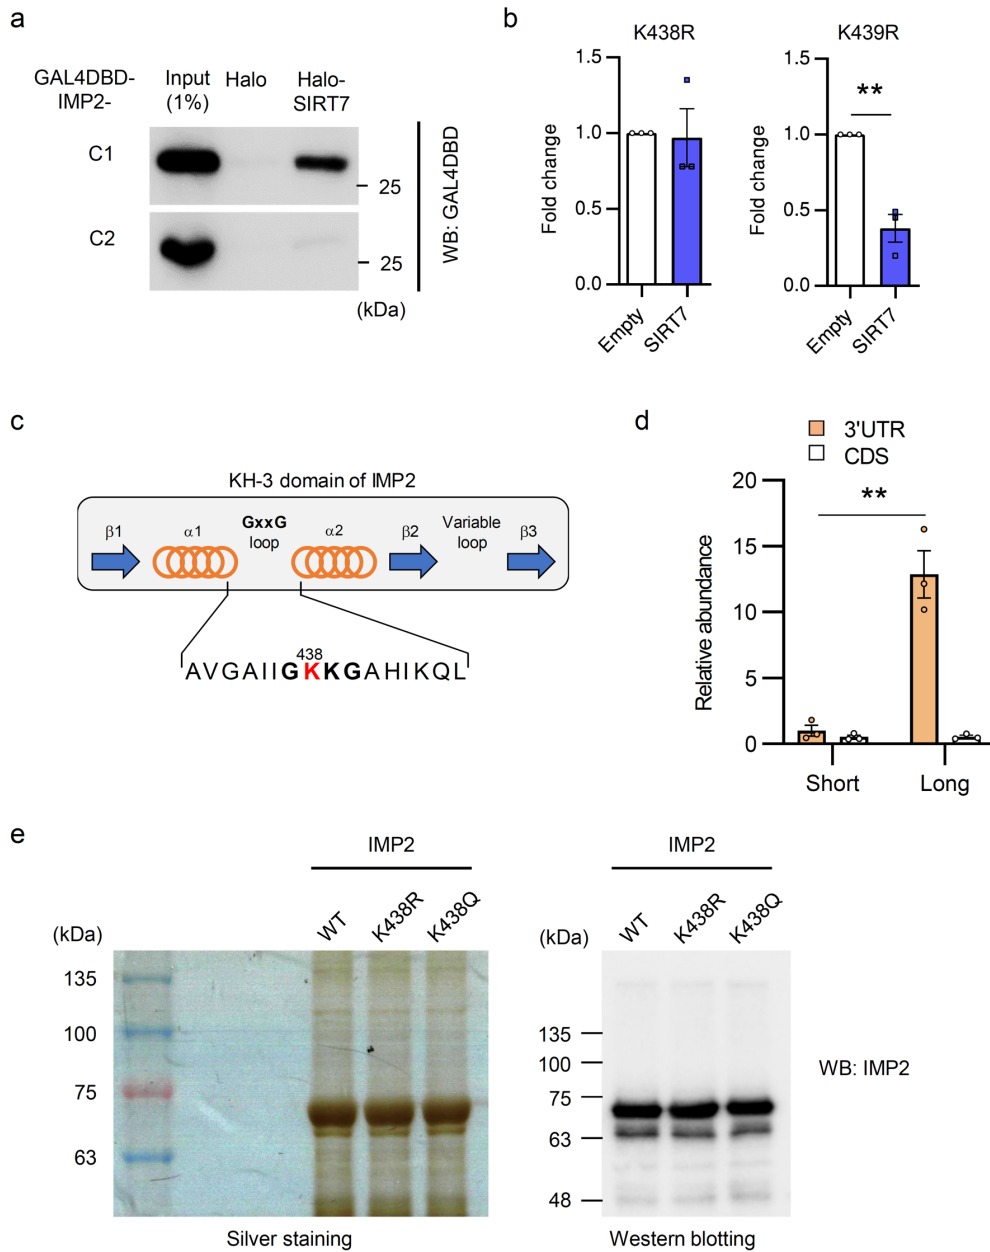

**f**

**Proteins containing KH domain**

AKAP1; **ANKHD1**; **ANKRD17**; ASCC1; BICC1; DDX43; DDX53; DPPA5; **FMR1**; FUBP1; **FUBP3**; **FXR1**; FXR2; GLD1; **HDLBP**; HNRPK; IGF2BP1; **IGF2BP2**; **IGF2BP3**; KHDRBS1; KHDRBS2; KHDRBS3; **KHSRP**; **KRR1**; MEX3A; MEX3B; MEX3C; MEX3D; NOVA1; NOVA2; PCBP1; PCBP2; PCBP3; PCBP4; PNO1; PNPT1; QKI; SF1; TDRKH

**Supplementary Fig. 6 Deacetylation of IMP2 by SIRT7 attenuates the translation of *Ucp1* mRNA.**

**a** Mapping of the region of the interaction between IMP2 and SIRT7. Halo-SIRT7 pull-down assay with lysates of HEK293T cells expressing the indicated IMP2 deletion mutants fused with GAL4DBD. See also Fig. 8c. **b** Quantification of the acetylated IMP2 relative to IMP2 (n = 3) in the experiment of Fig. 8d.  $p = 0.0025$ . **c** Topology of the KH-3 domain and amino acid sequence around K438 of mouse IMP2. **d** Binding of IMP2 to *in vitro*-transcribed short and long *Ucp1* 3'-UTR (n = 3 independent samples per group). The *Ucp1* coding sequence (CDS) was used as a negative control.  $p = 0.0030$ . **e** Generation of recombinant protein in *E. coli* for IMP2<sup>WT</sup>, IMP2<sup>K438R</sup>, and IMP2<sup>K438Q</sup>. To confirm that equal amounts of these recombinant proteins were used in the insect cell-free translation system, silver staining and WB were performed. This confirmation was performed once. **f** Candidate SIRT7-interacting proteins in KH domain family. The 10 proteins marked in red have been reported to be candidate SIRT7-interacting proteins<sup>49</sup>. See Discussion for details. WB, western blotting. Data are presented as means  $\pm$  SEM. All numbers (n) are biologically independent samples. \* $p < 0.05$ , \*\* $p < 0.01$  by two-tailed Student's *t*-test. Source data are provided in Source data file.

| qPCR primer pairs for mouse mRNA |                                                                         |                         |                         |
|----------------------------------|-------------------------------------------------------------------------|-------------------------|-------------------------|
| Symbol                           | Name                                                                    | Sequence                |                         |
|                                  |                                                                         | Forward                 | Reverse                 |
| <i>Rpl19</i>                     | ribosomal protein L19                                                   | AAGCCTGTGACTGTCCATTTC   | CTTCTTGGATTCCCAGGTATC   |
| <i>Pparg</i>                     | peroxisome proliferator-activated receptor gamma                        | GGAAGACCACTCGCATTCTT    | TGCGACTTTGGTATTCTTGGAG  |
| <i>Prdm16</i>                    | PR domain containing 16                                                 | GGCGAGGAAGCTAGCCAAA     | GGTCTCTCTCGGCACTCT      |
| <i>Ppargc1a</i>                  | peroxisome proliferative activated receptor, gamma, coactivator 1 alpha | GAAATCCGAGCGGAGCTGAA    | GAATAGGGCTGCGTGCCATC    |
| <i>Cebpb</i>                     | CCAAT/enhancer binding protein (C/EBP), beta                            | CAACCTGGAGACGCAGCACAAAG | CTAGCAGTGGCCCCGCCGAGG   |
| <i>Ebf2</i>                      | early B cell factor 2                                                   | GCTGCGGGAACCGGAACGAGA   | ACACGACCTGGAACCGCCTCA   |
| <i>Dio2</i>                      | deiodinase, iodothyronine, type II                                      | AGTCAAGAAGGTGGCATTTCG   | ACAGCTTCCTCTAGATGCCT    |
| <i>Ucp1</i>                      | uncoupling protein 1                                                    | GGCAACAAGAGCTGACAGTAAAT | GGCCCTTGTAACAACAATAATAC |
| <i>Elovl3</i>                    | elongation of very long chain fatty acids-like 3                        | TTGGGGATAGGGGGTGTGTG    | TCTCCCTCCCTCCAAGTC      |
| <i>Cidea</i>                     | cell death-inducing DFFA-like effector a                                | CTTGGGGTGGTACCCAGTG     | ATCCACGCAGTCCACACACA    |
| <i>Cox3</i>                      | mitochondrially encoded cytochrome c oxidase III                        | GCAGGATTCTTCTGAGCGTTCT  | GTCAGCAGCCTCCTAGATCATGT |
| <i>Cox8b</i>                     | cytochrome c oxidase subunit 8B                                         | GAACCATGAAGCCAACGACT    | GCGAAGTTCACAGTGGTTCC    |
| <i>Clstn3b</i>                   | calsyntenin 3                                                           | CTCCGCAGGAACAGCAGCCC    | AGGATAACCATAAGCACCAG    |
| <i>S100b</i>                     | S100 protein, beta polypeptide, neural                                  | TGGTTGCCCTCATTGATGTCT   | CCCATCCCCATCTTCGTCC     |
| <i>Bmp8b</i>                     | bone morphogenetic protein 8b                                           | CAACCACGCCACTATGCAG     | CACTCAGCTCAGTAGGCACA    |
| <i>Fgf21</i>                     | fibroblast growth factor 21                                             | GCCATTCACTTTGCTGAGC     | ATCCATTCCATCAGGGCTGC    |
| <i>Nrg4</i>                      | neuregulin 4                                                            | ATGCCAACAGATCACGAGC     | TCTTCAGTGTCTCTGTGGCTG   |
| <i>Il-6</i>                      | interleukin 6                                                           | CCACGGCCTTCCTACTTCA     | TTCCACGATTTCCAGAGAACA   |
| <i>Mstn</i>                      | myostatin                                                               | AGTGGATCTAAATGAGGGCAGT  | GTTTCAGGGCGCAGCTTAC     |
| <i>Sirt7</i>                     | sirtuin 7                                                               | TGCCAGGCACTTGGTTGTCT    | TAGGCTCCGCTTCGCTTAGG    |
| <i>Clpp</i>                      | caseinolytic mitochondrial matrix peptidase proteolytic subunit         | TGTTGCGGGAACGCATCGTGT   | TAGATGGCCAGGCCCGCAGTT   |
| <i>Mrps5</i>                     | mitochondrial ribosomal protein S5                                      | TCCCTGCATTGTGTAGCTTG    | GAGCTGTCTTCACTGCCAAA    |
| <i>Mrpl49</i>                    | mitochondrial ribosomal protein L49                                     | GAGCGACGAACAAAGTAGGG    | TACCAAAATCCCAGAGCCAC    |
| <i>Mfn1</i>                      | mitofusin 1                                                             | AGGGGACCGATGGAGATAAG    | AAGAGGGCACATTTGCTTTG    |
| <i>Polrmt</i>                    | polymerase (RNA) mitochondrial (DNA directed)                           | GCAACATGTCTGAGGGAGT     | GCACCTTCTTACCCTCATC     |
| <i>Cpt1a</i>                     | carnitine palmitoyltransferase 1a, liver                                | CCATGATGGACCCCAACA      | TGGACAACCTCCATGGCTCA    |
| <i>Acadm</i>                     | acyl-Coenzyme A dehydrogenase, medium chain                             | GCAGCTGGCGCTGTGGGGCT    | CGGCGTCAGTGGCTAGCTGATTG |
| <i>Acox1</i>                     | acyl-Coenzyme A oxidase 1, palmitoyl                                    | GGGAGTGTACGGGTACATG     | CCGATATCCCCAACAGTGATG   |
| <i>Ppara</i>                     | peroxisome proliferator activated receptor alpha                        | TTGAAGGAGCTTTGGGAAGA    | AGGAAGCCGTTCTGTGACAT    |
| <i>Ucp2</i>                      | uncoupling protein 2 (mitochondrial, proton carrier)                    | GAGGGTCCACGCAGCCTCTA    | GCATGCTCTGAGCCCTTGGT    |
| <i>Ucp3</i>                      | uncoupling protein 3 (mitochondrial, proton carrier)                    | GTGGCCCTGCACTACCCAAC    | CGGTGTCCAGGGGAAAAGTG    |
| <i>Acaca</i>                     | acetyl-Coenzyme A carboxylase alpha                                     | CCAGCTGATCCTGCGAACCT    | GAACATTCCCAGCAAGCCATC   |
| <i>Fasn</i>                      | fatty acid synthase                                                     | TCTGGCCAACCTCATTGGT     | GAAGCTGGGGTCCATTGTG     |
| <i>Me1</i>                       | malic enzyme 1, NADP(+)-dependent, cytosolic                            | CTGGCCAGGGCAACAATTCC    | TAGAGCCGGCCTTCTTGCAG    |
| <i>Elovl6</i>                    | ELOVL family member 6, elongation of long chain fatty acids             | GGAGCAGAGGGCGAGAGAAC    | GAGCGCTTCCGAAGTTCAA     |
| <i>Slc2a1</i>                    | solute carrier family 2 (facilitated glucose transporter), member 1     | GCTTATGGGCTTCTCCAACT    | GGTGACACCTCTCCACATAC    |
| <i>Slc2a4</i>                    | solute carrier family 2 (facilitated glucose transporter), member 4     | ACCCCTCATTCCCCTGTGT     | ACCCCTCTGCAGACCCCTTC    |
| <i>Gck</i>                       | glucokinase                                                             | CCCACAAATGCTCCAGTCC     | GTGGGAGGCCAGAAGCTGAA    |
| <i>Pdk4</i>                      | pyruvate dehydrogenase kinase, isoenzyme 4                              | CGCGCTCTGACCCGCAGCC     | GCCAGGCGGACGGGCAGCTC    |
| <i>Hk1</i>                       | hexokinase 1                                                            | TGCCTCTGGGCTTACCTTC     | CCACACAGTCGGTGGCTTTG    |
| <i>Ucp1 3'-UTR</i>               | uncoupling protein 1, 3'-UTR                                            | GCAACTTGAGGAAGAGATA     | GATTCTTTGGTTGGTTTATTTC  |
| <i>Ucp1 CDS</i>                  | uncoupling protein 1, coding sequence                                   | GGCCCTTGTAACAACAACA     | GTCGGTCTTCTTGGTGTA      |

| qPCR primer pairs for mouse genome |                                               |                                    |                      |
|------------------------------------|-----------------------------------------------|------------------------------------|----------------------|
| Symbol                             | Name                                          | Sequence                           |                      |
|                                    |                                               | Forward                            | Reverse              |
| <i>mt-Nd1</i>                      | NADH dehydrogenase 1, mitochondrial           | CCTATCACCCCTGCCATCAT               | GAGGCTGTTGCTTGTGTGAC |
| <i>Pecam1</i>                      | platelet/endothelial cell adhesion molecule 1 | ATGGAAAGCCTGCCATCATG               | TCCTTGTTGTTCAGCATCAC |
| Cloning primer pairs for cDNA      |                                               |                                    |                      |
| Symbol                             | Forward                                       | Reverse                            |                      |
| <i>Imp2</i>                        | agaattcATGATGAACAAGCTGTACATTGGG               | actcgagTCACTTGCTGCGCTGTGGGCGACTCCC |                      |
| Guide oligonucleotides for sgRNAs  |                                               |                                    |                      |
| Symbol                             | Forward                                       | Reverse                            |                      |
| <i>Imp2</i>                        | caccgGGGAACAAGGCCACGGCCCC                     | aaacgGGGCCGTGGCCTTGTCCCC           |                      |

**Supplementary Table 1 Information of primers.**

| Name                                                    | Host & Clonality / Source & Identifier                                                              | Dilution                              |
|---------------------------------------------------------|-----------------------------------------------------------------------------------------------------|---------------------------------------|
| anti-UCP1                                               | Rabbit Polyclonal /<br>Abcam, ab10983                                                               | 1:1000 dilution in TBST 5% BSA        |
| anti-GAPDH                                              | Rabbit Monoclonal (14C10) /<br>Cell Signaling Technology, #2118                                     | 1:1000 dilution in TBST 5% BSA        |
| Total OXPHOS Rodent WB Antibody<br>Cocktail             | Mouse Monoclonal (20E9DH10C12,<br>21A11AE7, 13G12AF12BB11,<br>1D6E1A8, 15H4C4) /<br>Abcam, ab110413 | 1:250 dilution in TBST 1% skim milk   |
| anti-Tyrosine Hydroxylase                               | Sheep Polyclonal /<br>Sigma-Aldrich, AB1542                                                         | 1:1000 dilution in TBST 5% BSA        |
| anti-RNA Pol II                                         | Mouse Monoclonal (4H8) /<br>Active Motif, #39097                                                    | 1:2000 dilution in TBST 3% skim milk  |
| anti-SIRT7                                              | Rabbit Monoclonal (D3K5A) /<br>Cell Signaling Technology, #5360                                     | 1:3000 dilution in TBST 5% BSA        |
| anti-IGFBP2(IMP2)                                       | Rabbit Polyclonal /<br>MBL, #RN008P                                                                 | 1:1000 dilution in TBST 5% BSA        |
| anti-DYKDDDDK (FLAG) tag                                | Mouse Monoclonal (1E6) /<br>Fujifilm Wako Pure Chemical<br>Corporation, #018-22381                  | 1:2000 dilution in TBST 3% skim milk  |
| anti-HA tag                                             | Rat Monoclonal (3F10) /<br>Roche Applied Science, #11867423001                                      | 1:1000 dilution in TBST 5% BSA        |
| anti-acetylated-lysine                                  | Rabbit Polyclonal /<br>Cell Signaling Technology, #9441                                             | 1:1000 dilution in TBST 5% BSA        |
| HRP-conjugated Affinipure Goat<br>anti-Rabbit IgG(H+L)  | Goat Polyclonal /<br>Proteintech, #SA00001-2                                                        | 1:10000 dilution in TBST 5% skim milk |
| HRP-conjugated Affinipure Goat<br>anti-Mouse IgG(H+L)   | Goat Polyclonal /<br>Proteintech, #SA00001-1                                                        | 1:10000 dilution in TBST 5% skim milk |
| HRP-conjugated Affinipure Goat<br>anti-Rat IgG(H+L)     | Goat Polyclonal /<br>Proteintech, #SA00001-15                                                       | 1:10000 dilution in TBST 5% skim milk |
| HRP-conjugated Affinipure Rabbit<br>anti-Sheep IgG(H+L) | Rabbit Polyclonal /<br>Proteintech, #SA00001-16                                                     | 1:10000 dilution in TBST 5% skim milk |

### Supplementary Table 2 Information of antibodies.

All antibodies used in this study are commercially available and have been validated by companies. The details of manufactures' validation can be found on the web site of each manufacture. See also the Reporting Summary.
