# Supplementary material for: SIRT7 suppresses energy expenditure and thermogenesis by regulating brown adipose tissue functions in mice
Source: PubMed Central journal article supplement (PMC9744749; doi:10.1038/s41467-022-35219-z), 2022-12-12
Supplement: 41467_2022_35219_MOESM3_ESM.pdf [file 41467_2022_35219_MOESM3_ESM.pdf]

### **Description of Additional Supplementary Files**

File Name: Supplementary Data 1

Description: The candidate molecules interacting with SIRT7. After Halo-SIRT7 pull-down assay, eluted proteins were resolved by SDS-PAGE, followed by silver staining (Fig. 7a). The gel lanes were cut into 26 pieces and the proteins within each gel piece were analyzed by LC-MS/MS analysis.
